# Supplementary material for: A Link between Atmospheric Pressure and Fertility of Drosophila Laboratory Strains
Source: MDPI journal article supplement (doi:10.3390/insects12100947), 2021-10-18
Supplement: s1 [file s1]

**Table S2.** Principal component analysis (PCA) on meteorological data and fertility level of Bi90 *D. melanogaster* strain.

| Principal component loadings |               |               |        |        |        |        |
|------------------------------|---------------|---------------|--------|--------|--------|--------|
| Variable                     | PC1           | PC2           | PC3    | PC4    | PC5    | PC6    |
| Temperature                  | <b>+0.926</b> | +0.204        | -0.204 | -0.043 | +0.123 | +0.207 |
| Humidity                     | <b>+0.657</b> | -0.153        | +0.459 | +0.531 | -0.227 | +0.013 |
| Wind speed                   | <b>-0.763</b> | +0.245        | +0.316 | +0.391 | +0.318 | +0.061 |
| Air Pressure                 | <b>-0.911</b> | -0.235        | +0.065 | -0.109 | -0.263 | +0.172 |
| Air Pressure change          | +0.247        | <b>-0.761</b> | +0.488 | -0.289 | +0.192 | +0.016 |
| Fertility (log)              | +0.107        | <b>+0.683</b> | +0.617 | -0.369 | -0.078 | -0.004 |
|                              | PC1           | PC2           | PC3    | PC4    | PC5    | PC6    |
| PC Eigenvalue                | 2.775         | 1.226         | 0.974  | 0.669  | 0.280  | 0.077  |
| Proportion of variance       | 0.462         | 0.204         | 0.162  | 0.111  | 0.047  | 0.013  |
| Cumulative variance          | 0.462         | 0.667         | 0.829  | 0.941  | 0.987  | 1.000  |

\* - supplementary variables were not used in PCA to determine PCs
