# Supplementary material for: A Link between Atmospheric Pressure and Fertility of Drosophila Laboratory Strains
Source: MDPI journal article supplement (doi:10.3390/insects12100947), 2021-10-18
Supplement: s1 [file s1]

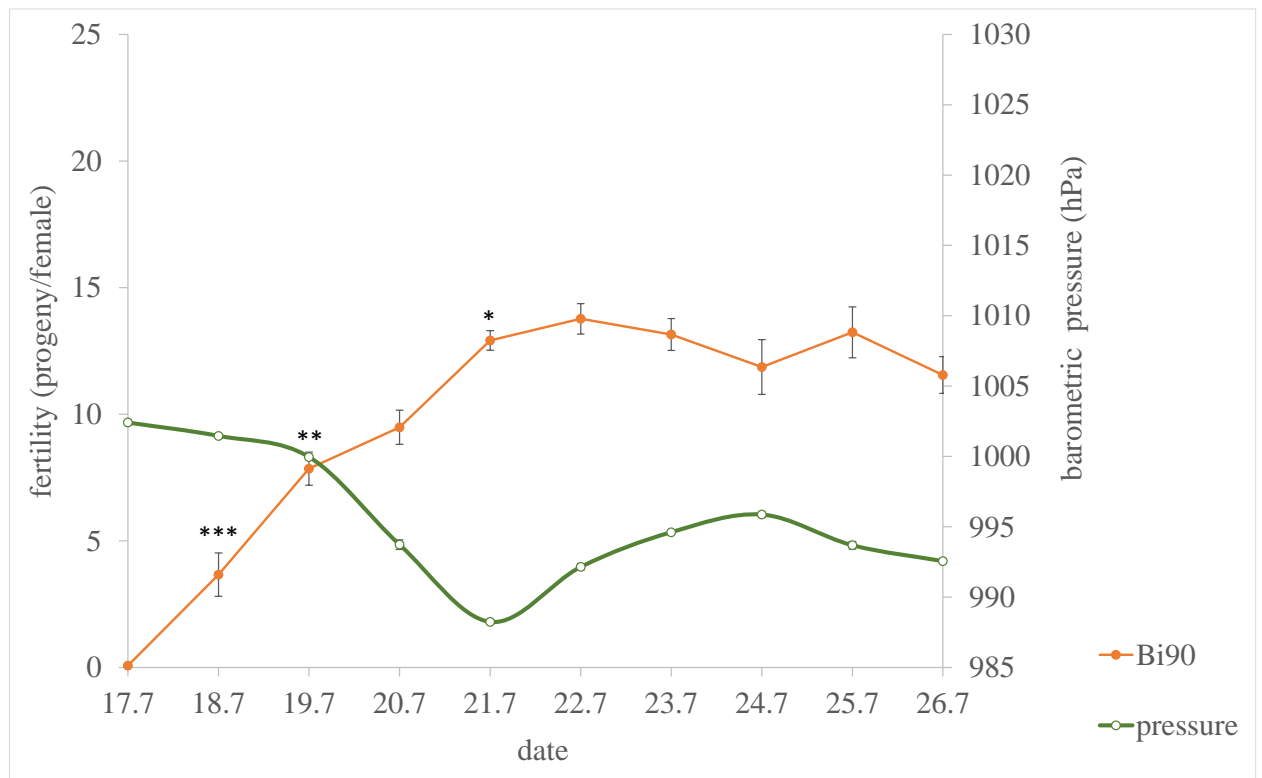

**Figure S2.** The fertility of *D. melanogaster* wild type strain Bi90 in comparison with variations of barometric pressure in Novosibirsk, Russia, in the end of July of 2020 (<https://www.wunderground.com/history>). Each point represents an average value of 10 tests (N=3 for each test) as means $\pm$ s.e.m. The asterisks illustrate the post-hoc differences in comparison with the fertility level on previous day. One asterisk indicates  $p<0.05$ ; two asterisks,  $p<0.01$ ; three –  $p<0.001$ .
