# Supplementary material for: A Link between Atmospheric Pressure and Fertility of Drosophila Laboratory Strains
Source: MDPI journal article supplement (doi:10.3390/insects12100947), 2021-10-18
Supplement: s1 [file s1]

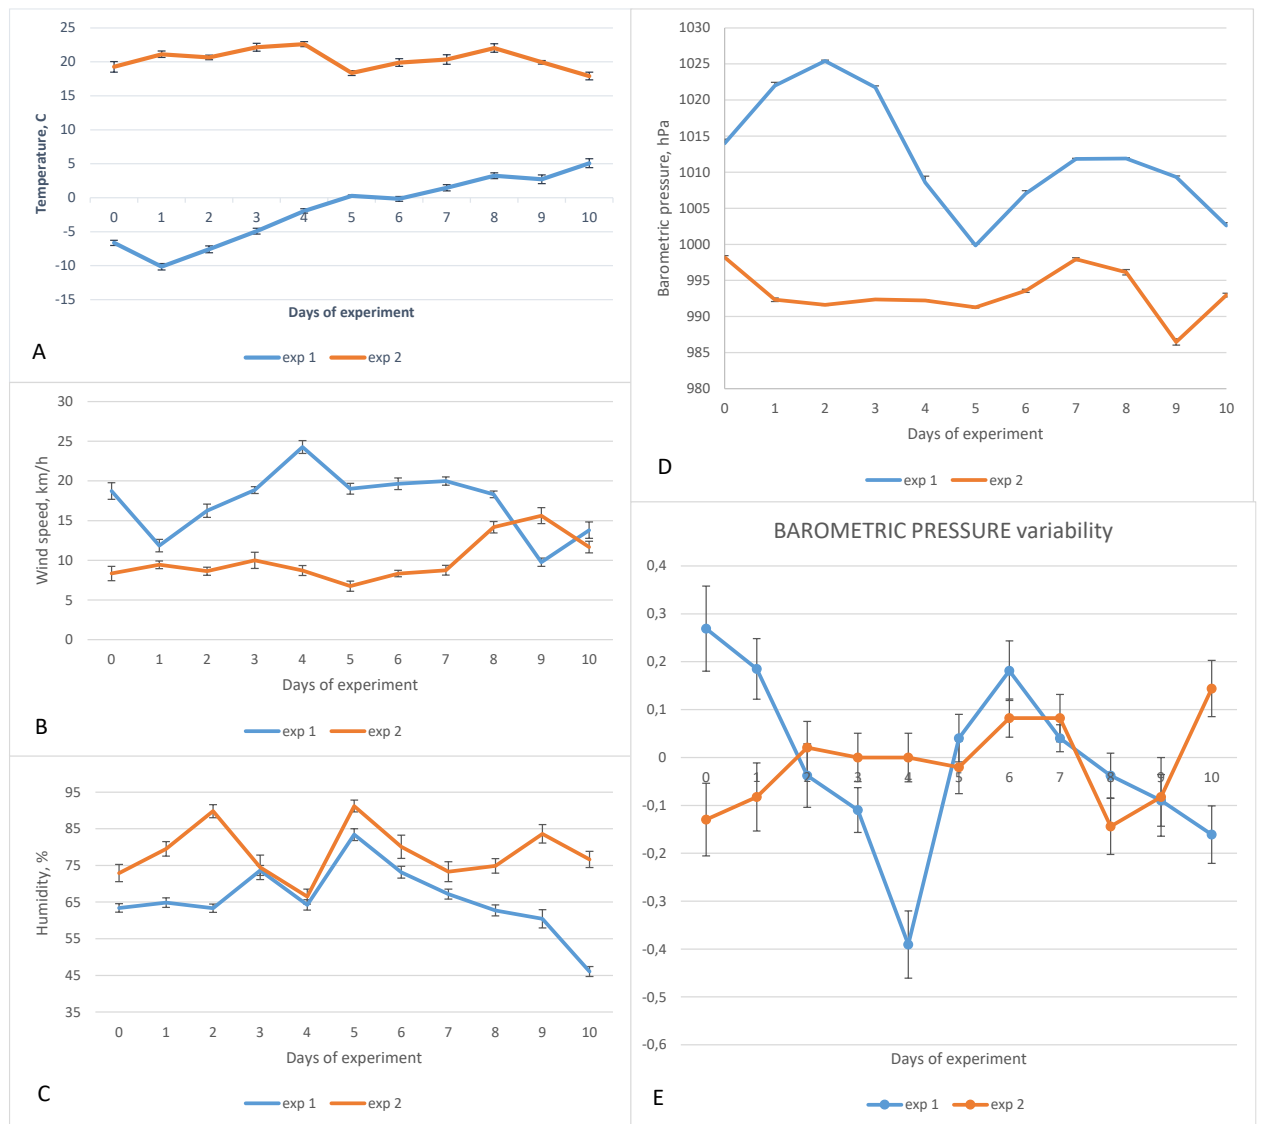

**Figure S1.** The within-day levels of (A) temperature, (B) wind speed, (C) humidity, (D) barometric pressure and (E) measure-to-measure atmospheric pressure changes during the first (blue, 23-03-2020 to 02-04-2020, days 0-10) and second (red, 01-07-2020 to 11-07-2020, days 0-10) experiments. Please note that the meteorological data were not counted from midnight to midnight as is shown on the website (<https://www.wunderground.com/history>) but from one daily transfer of flies into a new vial to the next. The data are presented as means + SEM.
