# Supplementary material for: A Link between Atmospheric Pressure and Fertility of Drosophila Laboratory Strains
Source: MDPI journal article supplement (doi:10.3390/insects12100947), 2021-10-18
Supplement: s1 [file s1]

**Table S1.** Principal component analysis (PCA) on meteorological data and fertility levels of Bi90 and 153 *D. melanogaster* strains.

| Principal component loadings   |        |        |        |        |        |        |
|--------------------------------|--------|--------|--------|--------|--------|--------|
| Variable                       | PC1    | PC2    | PC3    | PC4    | PC5    | PC6    |
| Temperature                    | +0.931 | +0.207 | -0.184 | -0.087 | +0.121 | +0.183 |
| Humidity                       | +0.703 | -0.026 | +0.344 | +0.579 | -0.228 | +0.007 |
| Wind speed                     | -0.757 | +0.329 | +0.195 | +0.423 | +0.316 | +0.050 |
| Air Pressure                   | -0.906 | -0.250 | +0.145 | -0.073 | -0.257 | +0.154 |
| Air Pressure change            | +0.287 | -0.726 | +0.568 | -0.159 | +0.206 | +0.011 |
| Fertility (log)                | +0.078 | +0.725 | +0.595 | -0.331 | -0.068 | -0.011 |
| Supplementary variable         | PC1    | PC2    | PC3    | PC4    | PC5    | PC6    |
| Experiment*                    | +0.939 | +0.105 | -0.084 | -0.037 | -0.036 | +0.219 |
| Within-day fertility variance* | +0.080 | +0.694 | +0.539 | -0.280 | -0.036 | +0.017 |
|                                | PC1    | PC2    | PC3    | PC4    | PC5    | PC6    |
| PC Eigenvalue                  | 2.844  | 1.267  | 0.888  | 0.662  | 0.279  | 0.060  |
| Proportion of variance         | 0.474  | 0.211  | 0.148  | 0.110  | 0.047  | 0.010  |
| Cumulative variance            | 0.474  | 0.685  | 0.833  | 0.943  | 0.990  | 1.000  |

\* - supplementary variables were not used in PCA to determine PCs
